# Supplementary material
Source: MDPI journal article supplement (https://www.mdpi.com/2073-4352/11/12/1499)
Supplement: s1 [file s1]

# Theoretical Prediction of CH<sub>n</sub> Crystal Structures under High Pressures

Tao Yang <sup>1,\*</sup>, Jinjia Liu <sup>2</sup>, Xiaotong Liu <sup>1</sup>, Xiulei Liu <sup>1</sup> and Ning Li <sup>1</sup>

<sup>1</sup> Beijing Advanced Innovation Center for Materials Genome Engineering, Computer School, Beijing Information Science and Technology University, Beijing 100192, China; liuxiaotong15@mails.ucas.ac.cn (X.L.); xiuleiliu@hotmail.com (X.L.); lining@bistu.edu.cn (N.L.)

<sup>2</sup> Beijing Advanced Innovation Center for Materials Genome Engineering, Industry-University Cooperation Base between Beijing Information S&T University and Synfuels China Technology Co. Ltd, Beijing 101400, China; liujinjia@sxicc.ac.cn

\* Correspondence: ytyangmei@bistu.edu.cn

# **CH<sub>2</sub> by USPEX**

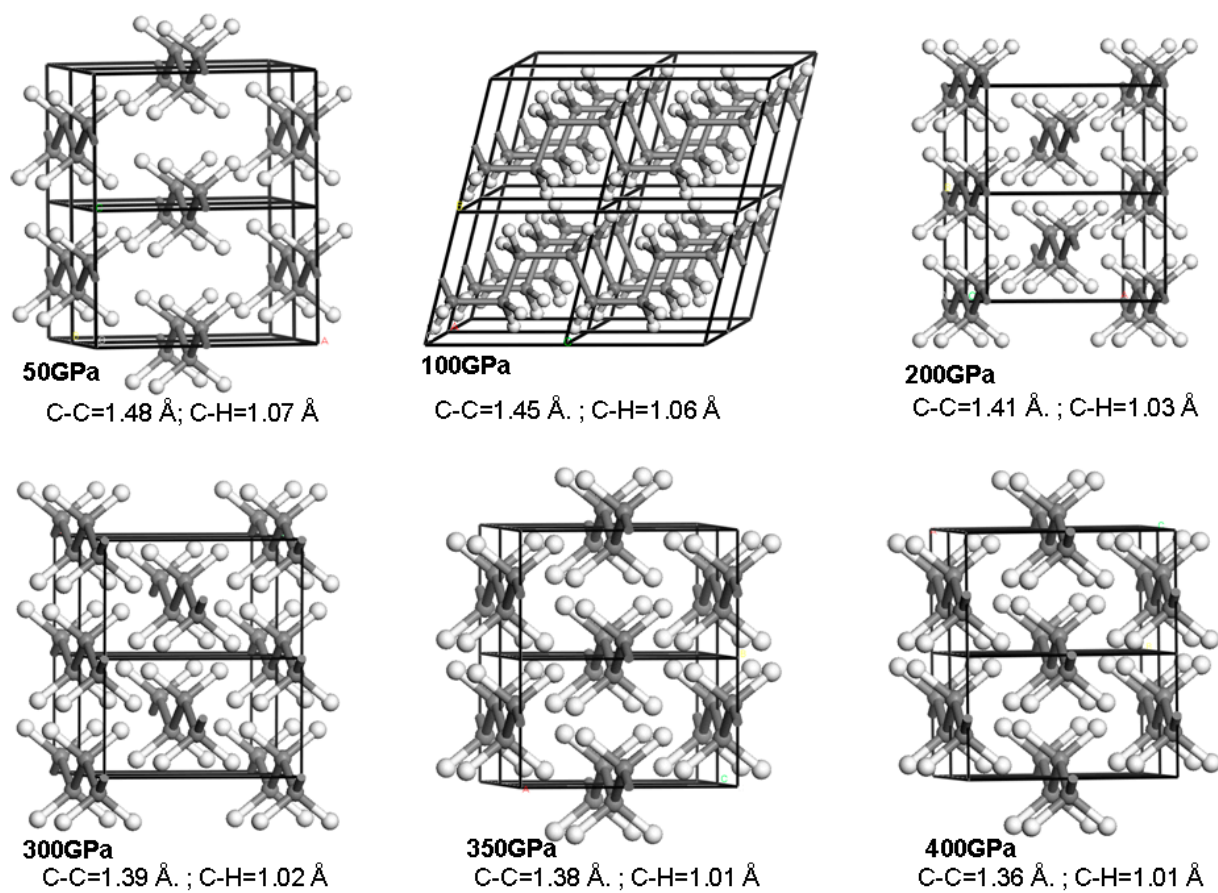

**Figure S1.** CH<sub>2</sub> structures under various pressure by USPEX.

**Table S1.** Calculated volume ( $\text{\AA}$ ), density ( $\text{g/cm}^3$ ),  $r_s$  of  $\text{CH}_2$  structures by USPEX. The Z and electron number in corresponding unit cell are show here.

| $\text{CH}_2$ | Z                      | $N_{\text{elect.}}$ | $V / \text{\AA}^3$ | $\rho \text{ g/cm}^3$ | $r_s$ |
|---------------|------------------------|---------------------|--------------------|-----------------------|-------|
| 0 GPa         | $\text{C}_4\text{H}_8$ | 16                  | 118.40             | 0.79                  | 2.29  |
| 50 GPa        | $\text{C}_4\text{H}_8$ | 16                  | 46.76              | 1.99                  | 1.68  |
| 100 GPa       | $\text{C}_4\text{H}_8$ | 16                  | 39.01              | 2.39                  | 1.58  |
| 200 GPa       | $\text{C}_4\text{H}_8$ | 16                  | 31.83              | 2.93                  | 1.48  |
| 300 GPa       | $\text{C}_4\text{H}_8$ | 16                  | 27.95              | 3.33                  | 1.41  |
| 350 GPa       | $\text{C}_4\text{H}_8$ | 16                  | 26.53              | 3.51                  | 1.39  |
| 400GPa        | $\text{C}_4\text{H}_8$ | 16                  | 25.34              | 3.68                  | 1.37  |

# CH<sub>4</sub> by USPEX

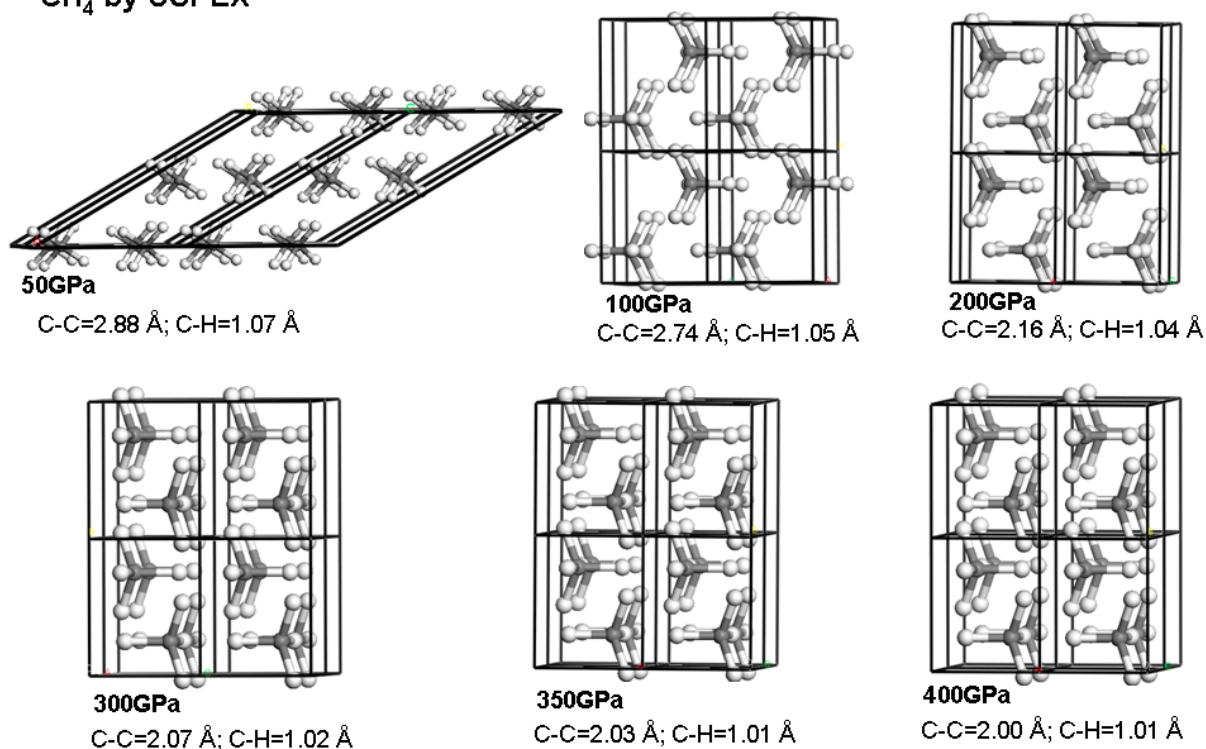

**Figure S2.** CH<sub>4</sub> structures under various pressure by USPEX

**Table S2.** Calculated volume (Å<sup>3</sup>), density (g/cm<sup>3</sup>),  $r_s$  of CH<sub>4</sub> structures by USPEX. The Z and electron number in corresponding unit cell are show here.

| CH <sub>4</sub> | Z                              | N <sub>elect.</sub> | V /Å <sup>3</sup> | $\rho$ g/cm <sup>3</sup> | $r_s$ |
|-----------------|--------------------------------|---------------------|-------------------|--------------------------|-------|
| 0 GPa           | C <sub>2</sub> H <sub>8</sub>  | 16                  | 127.07            | 0.42                     | 2.34  |
| 50 GPa          | C <sub>4</sub> H <sub>16</sub> | 32                  | 73.71             | 1.45                     | 1.55  |
| 100 GPa         | C <sub>2</sub> H <sub>8</sub>  | 16                  | 29.51             | 1.80                     | 1.44  |
| 200 GPa         | C <sub>2</sub> H <sub>8</sub>  | 16                  | 23.40             | 2.28                     | 1.33  |
| 300 GPa         | C <sub>2</sub> H <sub>8</sub>  | 16                  | 20.28             | 2.62                     | 1.27  |
| 350 GPa         | C <sub>2</sub> H <sub>8</sub>  | 16                  | 19.15             | 2.78                     | 1.25  |
| 400 GPa         | C <sub>2</sub> H <sub>8</sub>  | 16                  | 18.22             | 2.92                     | 1.23  |

**CH<sub>4</sub>-H<sub>2</sub> by USPEX**

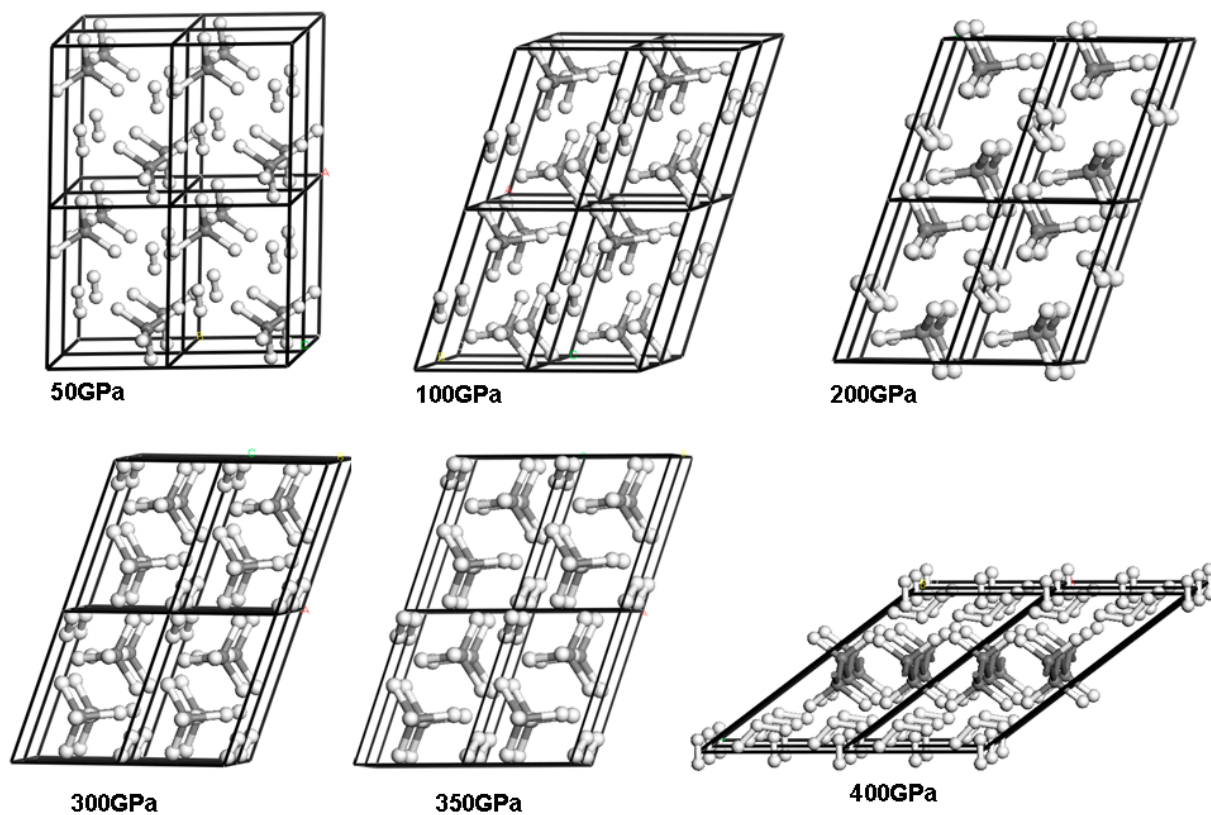

**Figure S3.** CH<sub>4</sub>-H<sub>2</sub> structures under various pressure by USPEX

**Table S3.** Calculated volume (Å<sup>3</sup>), density (g/cm<sup>3</sup>),  $r_s$  of CH<sub>4</sub>-H<sub>2</sub> structures by USPEX.

The Z and electron number in corresponding unit cell are show here.

| CH <sub>4</sub> -H <sub>2</sub> | Z                              | N <sub>elect.</sub> | V / Å <sup>3</sup> | $\rho$ g/cm <sup>3</sup> | $r_s$ |
|---------------------------------|--------------------------------|---------------------|--------------------|--------------------------|-------|
| 0 GPa                           | C <sub>2</sub> H <sub>12</sub> | 20                  | 208.19             | 0.29                     | 2.56  |
| 50 GPa                          | C <sub>2</sub> H <sub>12</sub> | 20                  | 48.31              | 1.24                     | 1.57  |
| 100 GPa                         | C <sub>2</sub> H <sub>12</sub> | 20                  | 38.65              | 1.55                     | 1.46  |
| 200 GPa                         | C <sub>2</sub> H <sub>12</sub> | 20                  | 30.45              | 1.97                     | 1.35  |
| 300 GPa                         | C <sub>2</sub> H <sub>12</sub> | 20                  | 26.09              | 2.30                     | 1.28  |
| 350 GPa                         | C <sub>2</sub> H <sub>12</sub> | 20                  | 24.58              | 2.44                     | 1.26  |
| 400 GPa                         | C <sub>4</sub> H <sub>24</sub> | 40                  | 45.88              | 2.61                     | 1.23  |

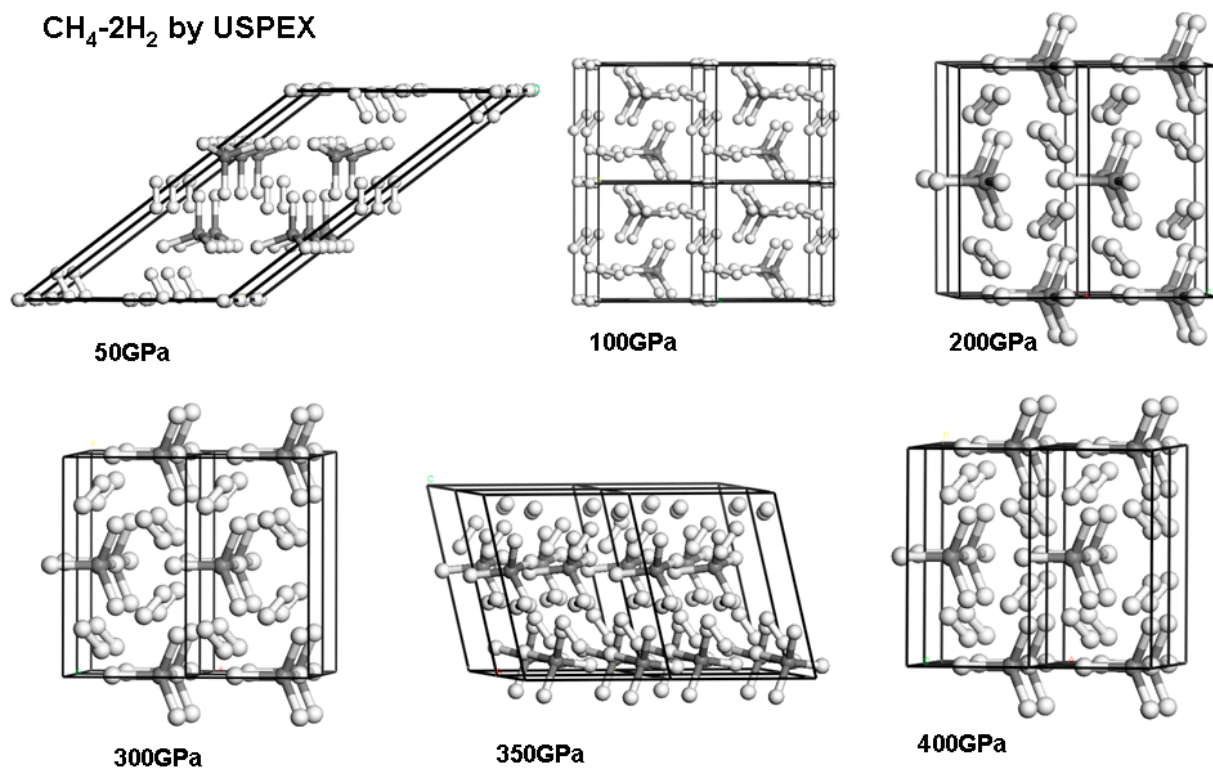

**Figure S4.** CH<sub>4</sub>-2H<sub>2</sub> structures under various pressure by USPEX

**Table S4.** Calculated volume (Å<sup>3</sup>), density (g/cm<sup>3</sup>),  $r_s$  of CH<sub>4</sub>-2H<sub>2</sub> structures by USPEX. The Z and electron number in corresponding unit cell are show here.

| CH <sub>4</sub> -2H <sub>2</sub> | Z                              | N <sub>elect.</sub> | V / Å <sup>3</sup> | $\rho$ g/cm <sup>3</sup> | $r_s$ |
|----------------------------------|--------------------------------|---------------------|--------------------|--------------------------|-------|
| 0 GPa                            | CH <sub>8</sub>                | 12                  | 132.66             | 0.25                     | 2.61  |
| 50 GPa                           | C <sub>4</sub> H <sub>32</sub> | 48                  | 120.91             | 1.10                     | 1.60  |
| 100 GPa                          | C <sub>2</sub> H <sub>16</sub> | 24                  | 48.11              | 1.39                     | 1.48  |
| 200 GPa                          | C <sub>2</sub> H <sub>16</sub> | 24                  | 37.21              | 1.79                     | 1.36  |
| 300 GPa                          | C <sub>2</sub> H <sub>16</sub> | 24                  | 31.87              | 2.09                     | 1.29  |
| 350 GPa                          | C <sub>4</sub> H <sub>32</sub> | 48                  | 59.92              | 2.23                     | 1.26  |
| 400 GPa                          | C <sub>2</sub> H <sub>16</sub> | 24                  | 28.43              | 2.35                     | 1.24  |

# **CH<sub>4</sub>-3H<sub>2</sub> by USPEX**

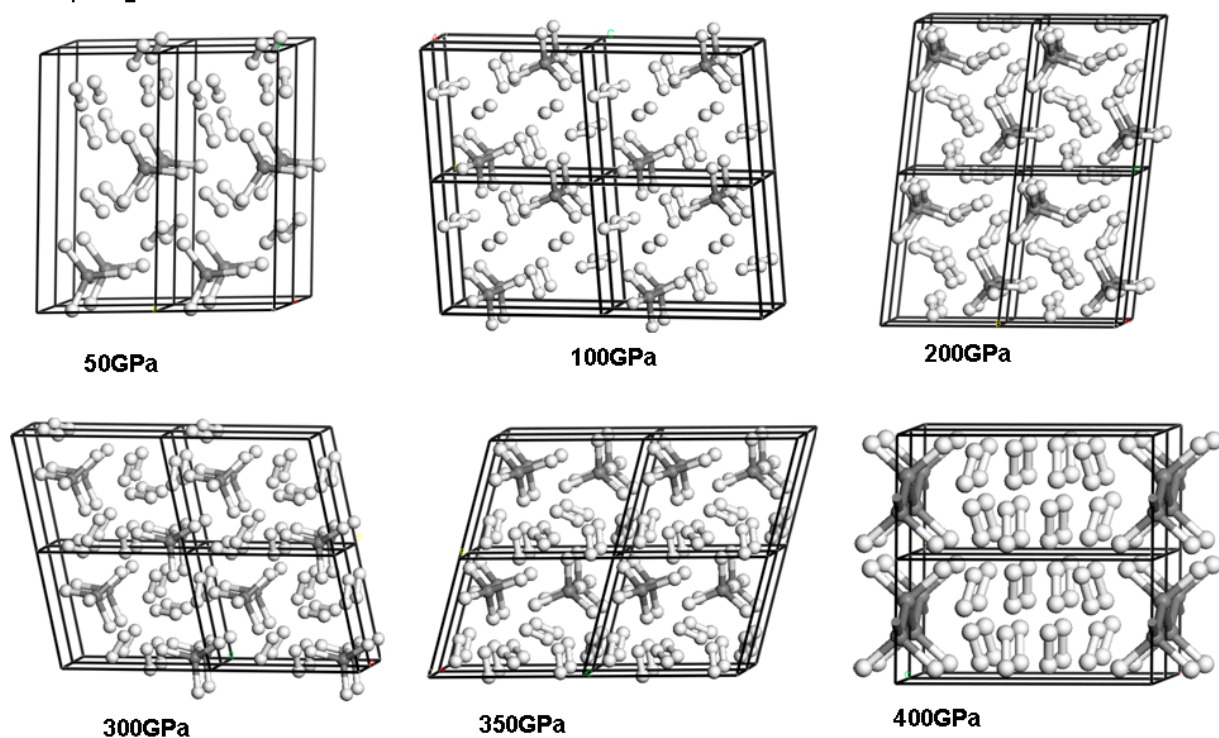

**Figure S5.** CH<sub>4</sub>-3H<sub>2</sub> structures under various pressure by USPEX

**Table S5.** Calculated volume (Å<sup>3</sup>), density (g/cm<sup>3</sup>),  $r_s$  of CH<sub>4</sub>-3H<sub>2</sub> structures by USPEX. The Z and electron number in corresponding unit cell are show here.

| CH <sub>4</sub> -3H <sub>2</sub> | Z                              | N <sub>elect.</sub> | V /Å <sup>3</sup> | ρ g/cm <sup>3</sup> | $r_s$ |
|----------------------------------|--------------------------------|---------------------|-------------------|---------------------|-------|
| 0 GPa                            | CH <sub>10</sub>               | 14                  | 165.89            | 0.22                | 2.67  |
| 50 GPa                           | C <sub>2</sub> H <sub>20</sub> | 28                  | 72.30             | 1.02                | 1.61  |
| 100 GPa                          | C <sub>2</sub> H <sub>20</sub> | 28                  | 57.29             | 1.28                | 1.49  |
| 200 GPa                          | C <sub>2</sub> H <sub>20</sub> | 28                  | 44.43             | 1.65                | 1.37  |
| 300 GPa                          | C <sub>2</sub> H <sub>20</sub> | 28                  | 37.84             | 1.94                | 1.30  |
| 350 GPa                          | C <sub>2</sub> H <sub>20</sub> | 28                  | 35.58             | 2.06                | 1.27  |
| 400 GPa                          | C <sub>2</sub> H <sub>20</sub> | 28                  | 33.22             | 2.21                | 1.24  |



# CH<sub>4</sub>-4H<sub>2</sub> by USPEX

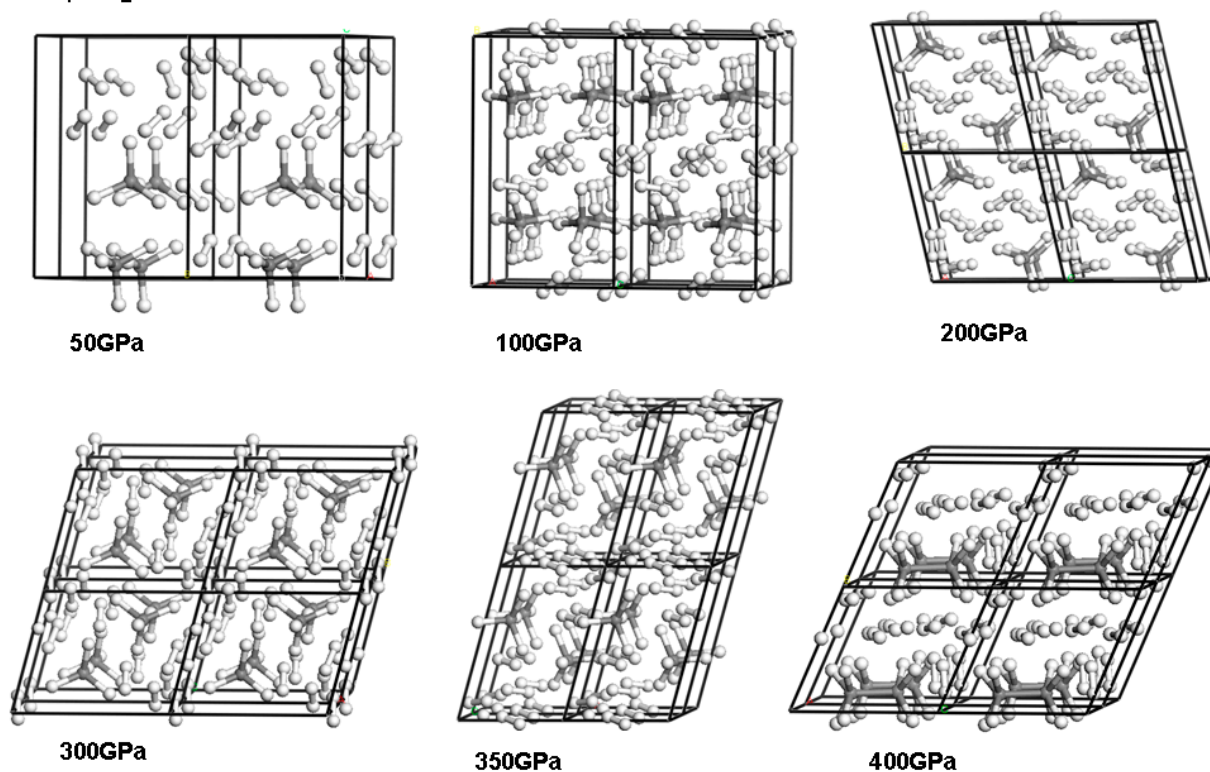

**Figure S6.** CH<sub>4</sub>-4H<sub>2</sub> structures under various pressure by USPEX

**Table S6.** Calculated volume (Å<sup>3</sup>), density (g/cm<sup>3</sup>),  $r_s$  of CH<sub>4</sub>-4H<sub>2</sub> structures by USPEX. The Z and electron number in corresponding unit cell are show here.

| CH <sub>4</sub> -4H <sub>2</sub> | Z                              | N <sub>elect.</sub> | V / Å <sup>3</sup> | $\rho$ g/cm <sup>3</sup> | $r_s$ |
|----------------------------------|--------------------------------|---------------------|--------------------|--------------------------|-------|
| 0 GPa                            | CH <sub>12</sub>               | 16                  | 196.56             | 0.20                     | 2.71  |
| 50 GPa                           | C <sub>2</sub> H <sub>24</sub> | 32                  | 84.80              | 0.94                     | 1.62  |
| 100 GPa                          | C <sub>4</sub> H <sub>48</sub> | 64                  | 132.59             | 1.21                     | 1.50  |
| 200 GPa                          | C <sub>2</sub> H <sub>24</sub> | 32                  | 51.35              | 1.56                     | 1.37  |
| 300 GPa                          | C <sub>2</sub> H <sub>24</sub> | 32                  | 43.58              | 1.84                     | 1.30  |
| 350 GPa                          | C <sub>2</sub> H <sub>24</sub> | 32                  | 40.98              | 1.95                     | 1.27  |
| 400 GPa                          | C <sub>2</sub> H <sub>24</sub> | 32                  | 38.17              | 2.09                     | 1.24  |



## CH<sub>x</sub> structures at 1 atm

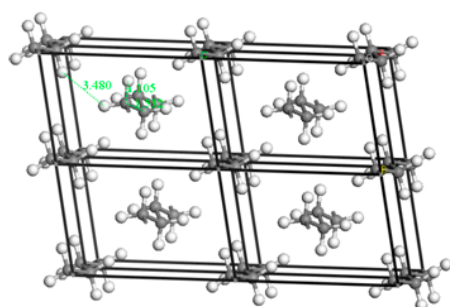

CH<sub>2</sub> by USPEX at 1 atm

$\Delta H_f = -0.52$  eV per C

C-H = 1.11 Å

C-C = 1.53 Å

Inter-(H----H) = 2.84 Å

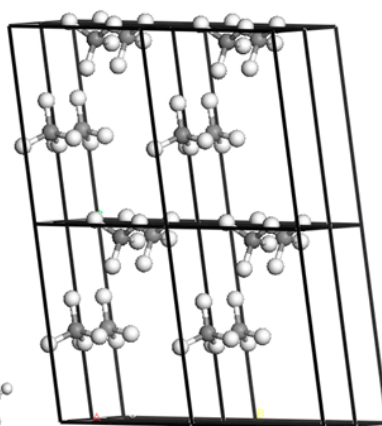

CH<sub>4</sub> by USPEX at 1 atm

$\Delta H_f = -1.27$  eV per C

C-H = 1.10 Å

C-C = 4.20 Å

Inter-(H-----H) = 2.68 Å

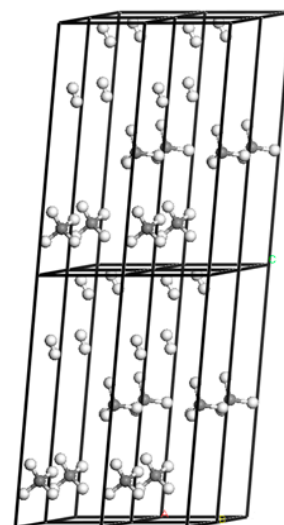

CH<sub>4</sub>-H<sub>2</sub> by USPEX at 1 atm

$\Delta H_f = -1.27$  eV per C

C-H = 1.10 Å

C-C = 4.19 Å

Inter-(H----H) = 2.78 Å

Inter-(H<sub>2</sub>—H<sub>2</sub>) = 3.13 Å

Inter-(H<sub>2</sub>-CH<sub>4</sub>) = 2.78 Å

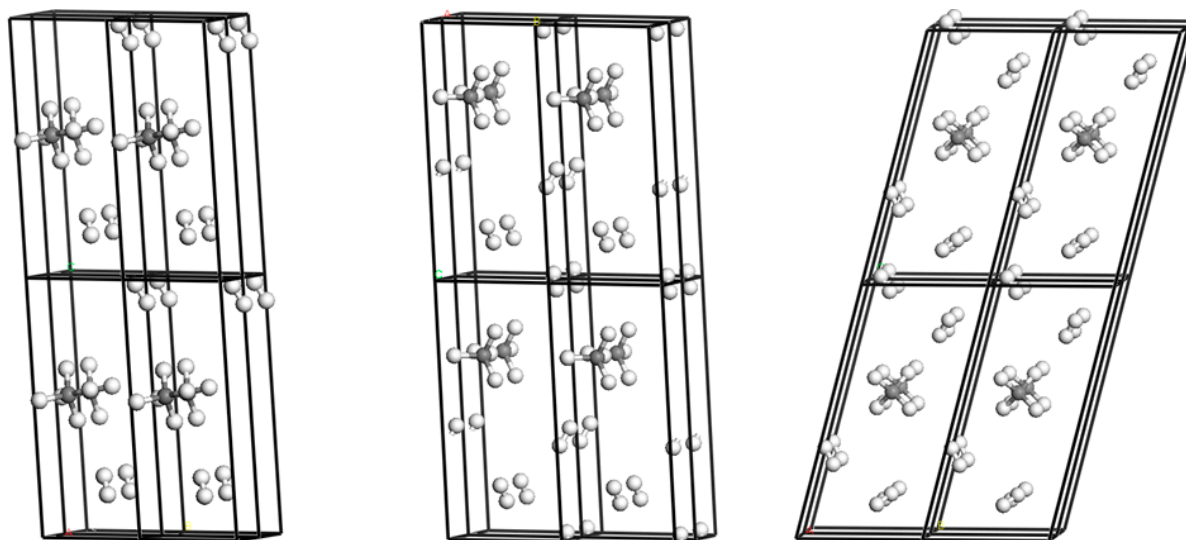

CH<sub>4</sub>-2H<sub>2</sub> by USPEX at 1 atm  $\Delta H_f = -1.26$  eV per C  
 CH<sub>4</sub>-3H<sub>2</sub> by USPEX at 1 atm  $\Delta H_f = -1.27$  eV per C  
 CH<sub>4</sub>-4H<sub>2</sub> by USPEX at 1 atm  $\Delta H_f = -1.27$  eV per C

C-H = 1.10 Å

C-H = 1.10 Å

C-H = 1.10 Å

C-C = 3.96 Å

C-C = 4.07 Å

C-C = 4.09 Å

Inter-(H----H) = 2.83 Å

Inter-(H----H) = 2.95 Å

Inter-(H----H) = 2.92 Å

Inter-(H<sub>2</sub>—H<sub>2</sub>) = 3.65 Å

Inter-(H<sub>2</sub>—H<sub>2</sub>) = 2.95 Å

Inter-(H<sub>2</sub>—H<sub>2</sub>) = 3.07 Å

Inter-(H<sub>2</sub>-CH<sub>4</sub>) = 2.87 Å

Inter-(H<sub>2</sub>-CH<sub>4</sub>) = 3.02 Å

Inter-(H<sub>2</sub>-CH<sub>4</sub>) = 2.92 Å

**Figure S7.** CH<sub>x</sub> structures at 1 atm by USPEX

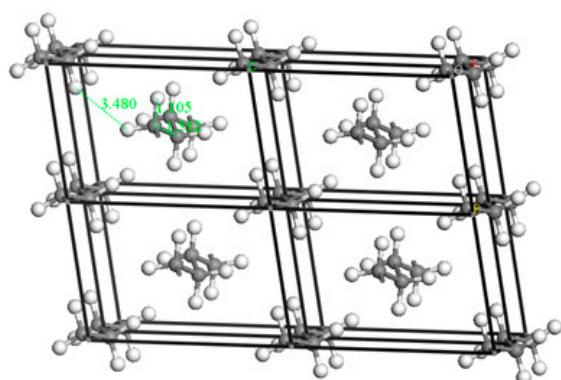

CH<sub>2</sub> by USPEX at 1 atm

$\Delta H_f = -0.52$  eV per C

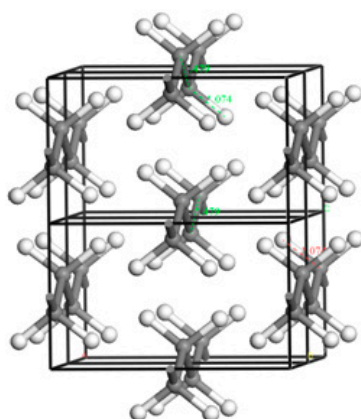

CH<sub>2</sub> by USPEX at 50 GPa

$\Delta H_f = -0.54$  eV per C

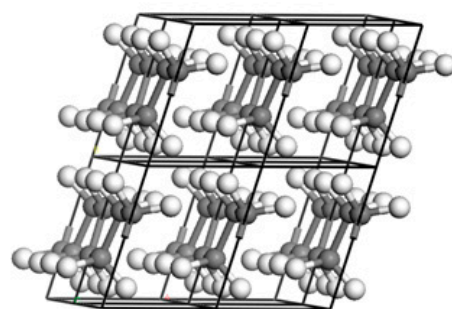

CH<sub>2</sub> structure at 50 GPa  
(taken from 100 GPa by USPEX)

$\Delta H_f = -0.52$  eV per C

**Figure S8.** CH<sub>2</sub> structures by USPEX

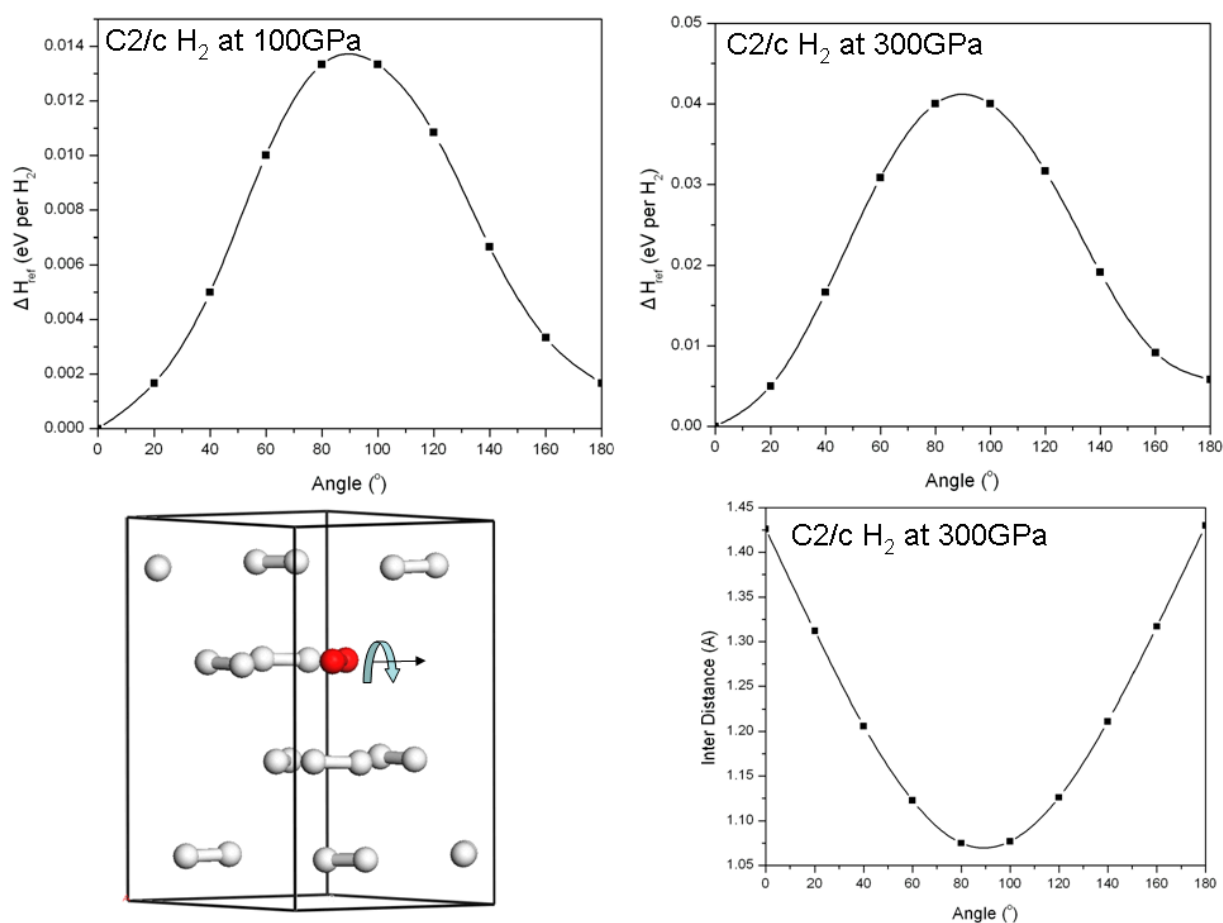

**Figure S9.** Scanned potential energy surfaces of rotation in two solid H<sub>2</sub> structures (at 100 GPa and 300 GPa, respectively).

**Figure S9** shows the calculated potential energy surface of H<sub>2</sub> rotation in two solid H<sub>2</sub> structures (100 GPa and 300 GPa, respectively). The H<sub>2</sub> (red color) rotational direction is inserted in the shown structure. Note that only one H<sub>2</sub> molecule is rotated. The rotational barrier at 100 GPa is around 0.014 eV per H<sub>2</sub>, which is 3 times lower than that of at 300 GPa (0.04 eV per H<sub>2</sub>). As expected, the barrier is increased with pressure. To put it another way, the pressure can play a role on stopping a rotation.

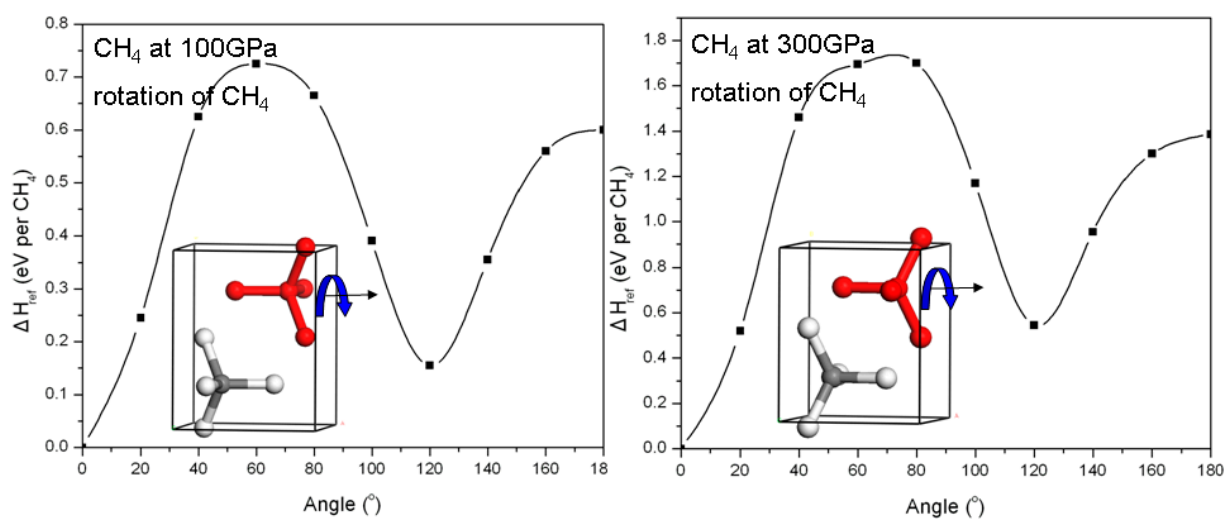

**Figure S10.** Scanned potential energy surfaces of rotation in two solid CH<sub>4</sub> structures (at 100GPa and 300GPa, respectively).

The potential energy surfaces of CH<sub>4</sub> rotation in two solid CH<sub>4</sub> structure is shown in **Figure S10**. At 100 GPa, the biggest barrier of CH<sub>4</sub> rotation is 0.75 eV per CH<sub>4</sub>; it is increased to 1.70 eV per CH<sub>4</sub> at 300 GPa. Such barriers are quite higher than in the solid H<sub>2</sub> structures at corresponding pressure.

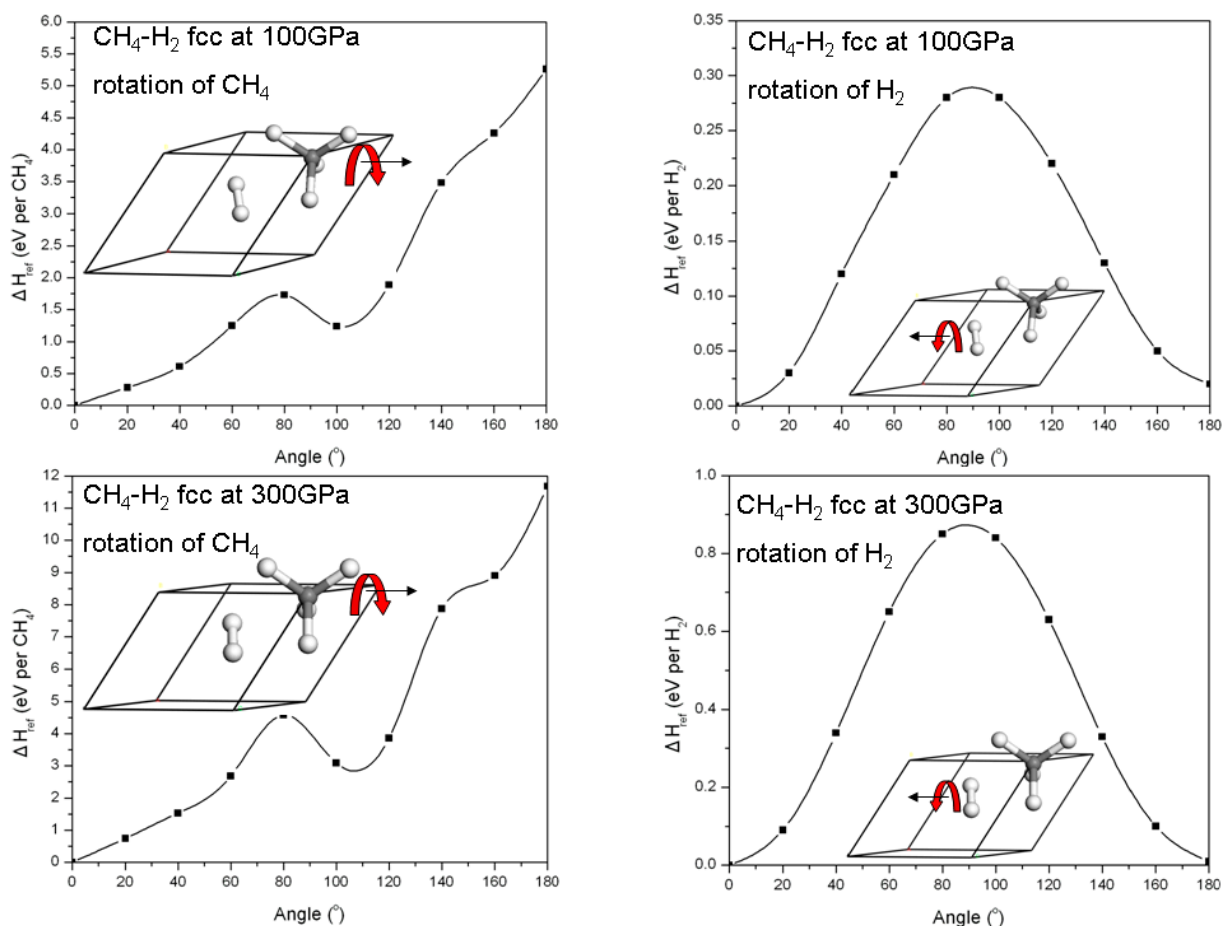

**Figure S11.** Scanned potential energy surfaces of rotation in two solid CH<sub>4</sub>-H<sub>2</sub> fcc (at 100 GPa and 300 GPa, respectively) structure.

We also repeat the calculations at CH<sub>4</sub>-H<sub>2</sub> fcc structures. In the CH<sub>4</sub>-H<sub>2</sub> structure, there are two kinds of rotations considered – CH<sub>4</sub> and H<sub>2</sub> rotation. At each pressure (100 GPa and 300 GPa), the barrier of CH<sub>4</sub> rotation is higher than that of H<sub>2</sub> rotation. One can see there are uphill in the potential energy surfaces of CH<sub>4</sub> rotations, indicating the CH<sub>4</sub> rotation is blocked by pressure. For the rotation of H<sub>2</sub> in CH<sub>4</sub>-H<sub>2</sub>, they, 0.30 eV per H<sub>2</sub> at 100 GPa and 0.85 eV per H<sub>2</sub> at 300 GPa, are higher than in pure H<sub>2</sub> structures (0.014 vs. 0.04 eV per H<sub>2</sub>).

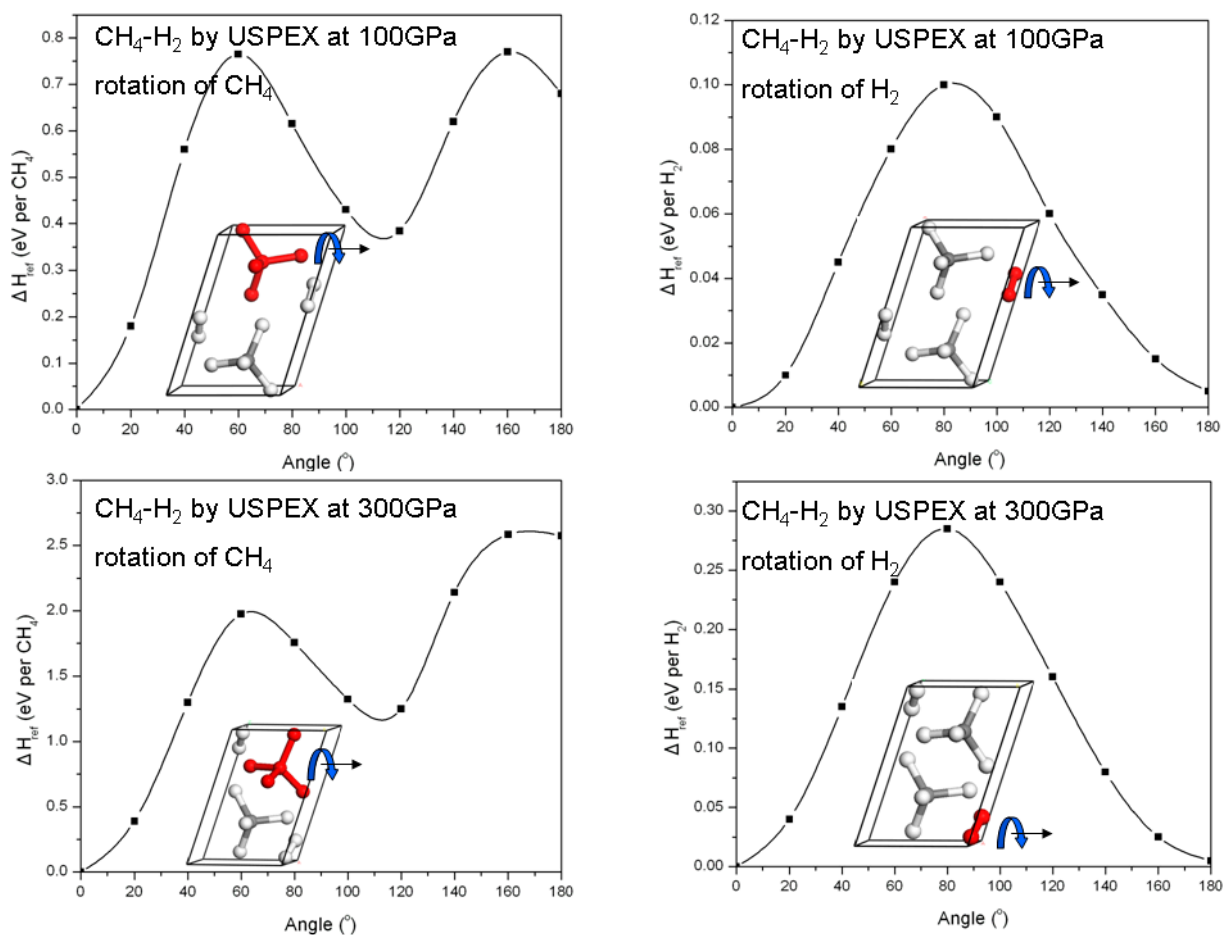

**Figure S12.** Scanned potential energy surfaces of rotation in two solid CH<sub>4</sub>-H<sub>2</sub> structures (at 100 GPa and 300 GPa, respectively) by USPEX.

The potential energy surfaces of rotation in the CH<sub>4</sub>-H<sub>2</sub> structures by USPEX are scanned, as shown in **Figure S12**. The barriers of CH<sub>4</sub> and H<sub>2</sub> rotation are quite lower than corresponding rotations in the CH<sub>4</sub>-H<sub>2</sub> fcc structures.



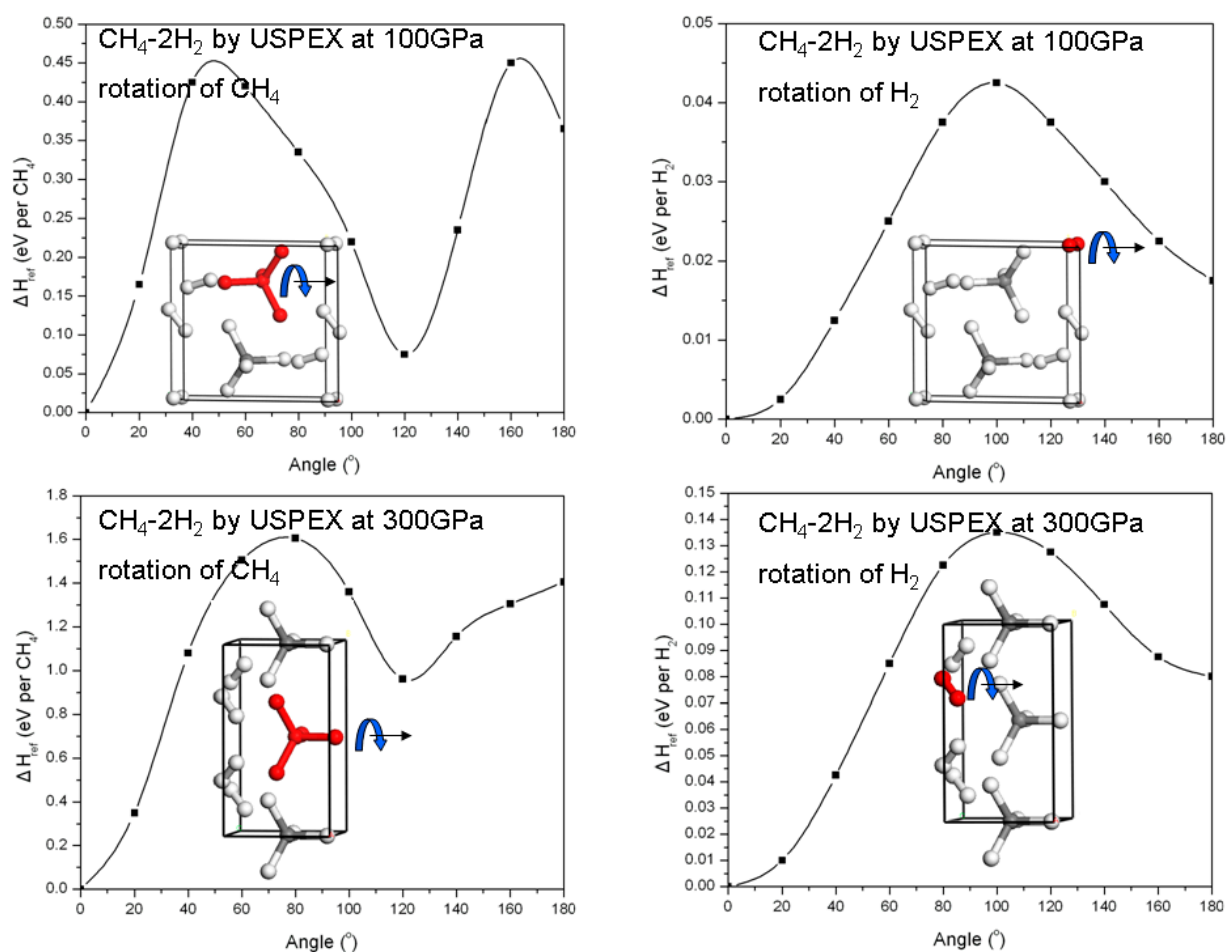

**Figure S13.** Scanned potential energy surfaces of rotation in two solid  $\text{CH}_4\text{-}2\text{H}_2$  structures (at 100 GPa and 300 GPa, respectively) by USPEX.

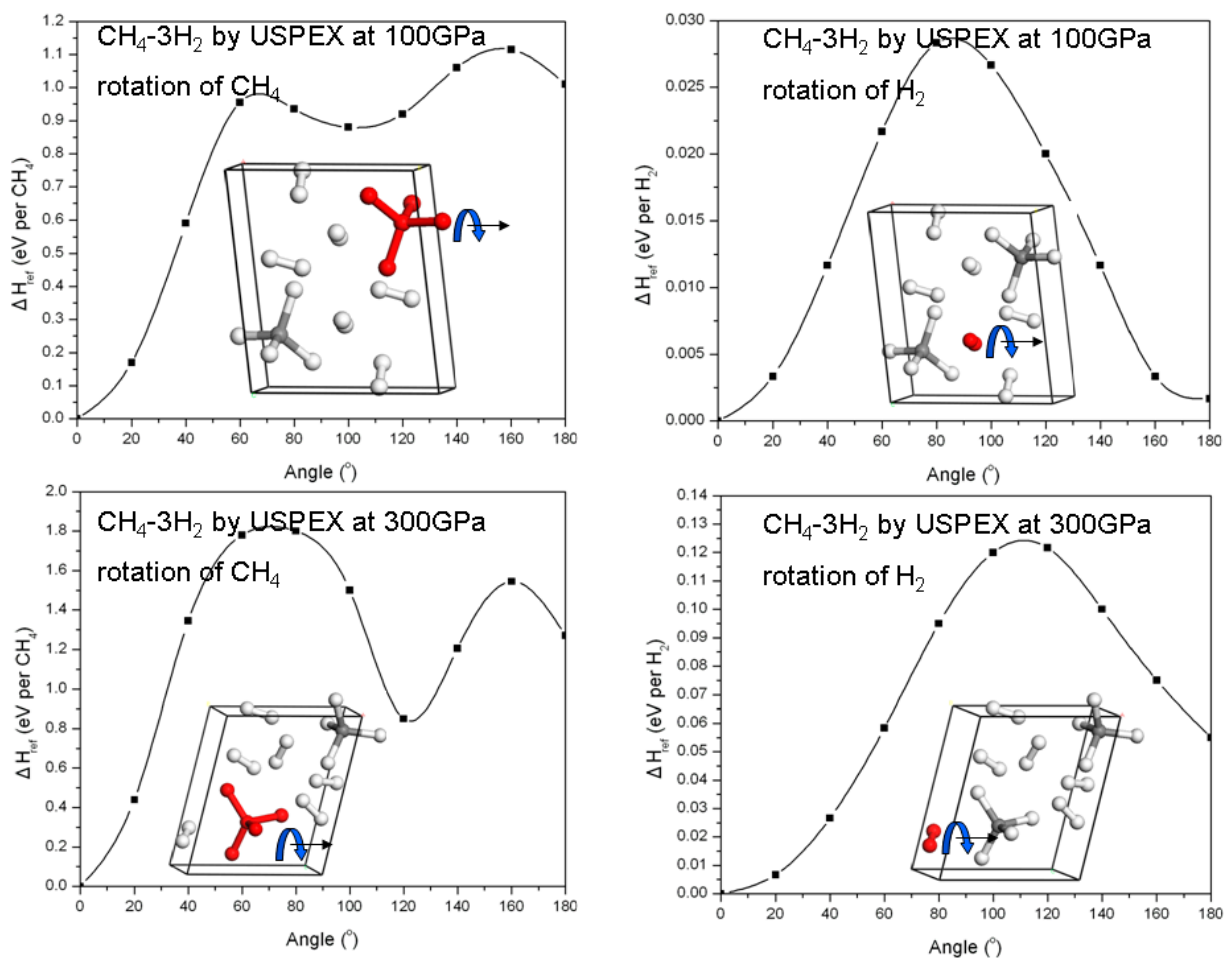

**Figure S14.** Scanned potential energy surfaces of rotation in two solid  $\text{CH}_4\text{-3H}_2$  structures (at 100 GPa and 300 GPa, respectively) by USPEX.

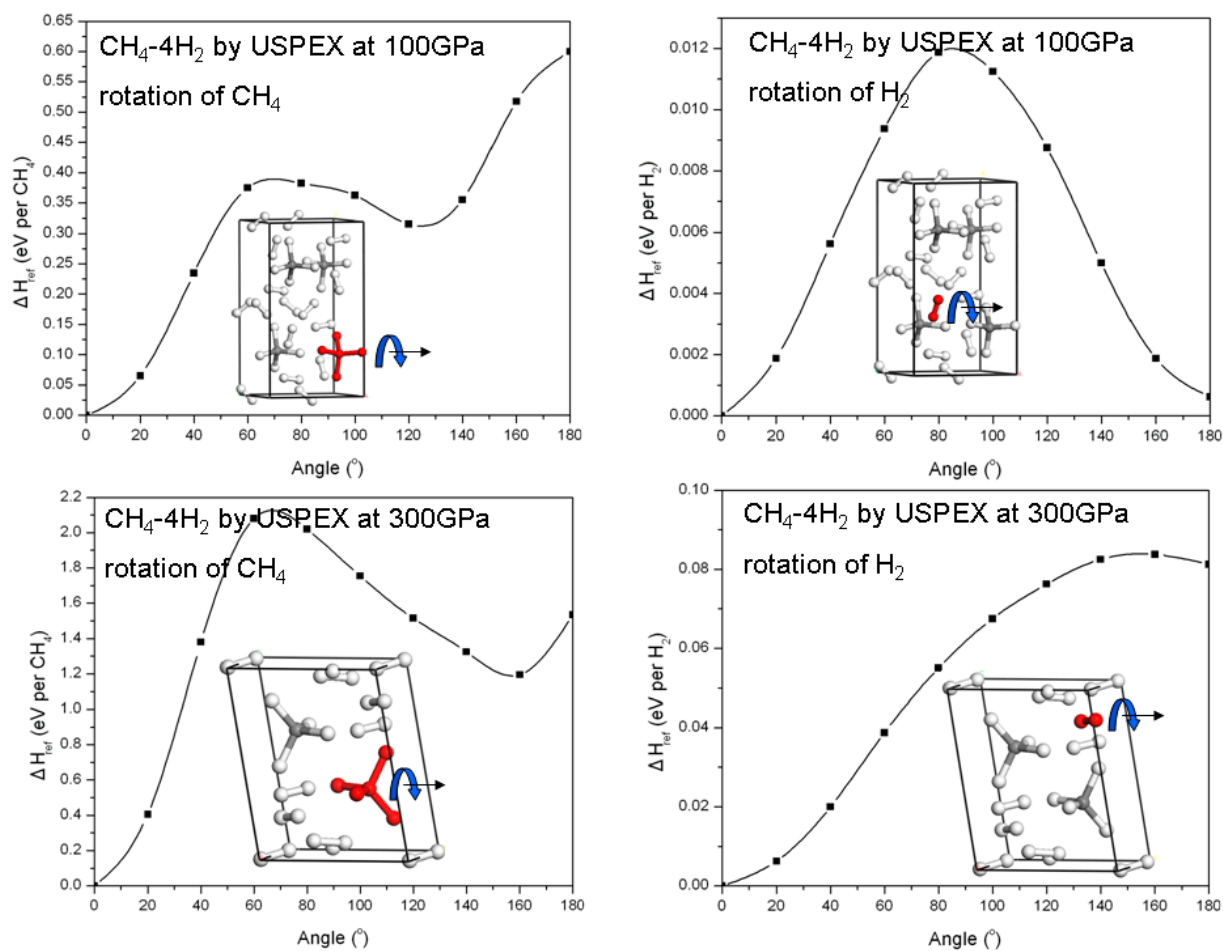

**Figure S15.** Scanned potential energy surfaces of rotation in two solid CH<sub>4</sub>-4H<sub>2</sub> structures (at 100 GPa and 300 GPa, respectively) by USPEX.

**Table S7.** The biggest barriers of rotation in H<sub>2</sub> and CH<sub>x</sub> structures.

|                                           | H <sub>2</sub> rotation (eV per H <sub>2</sub> ) |         | CH <sub>4</sub> rotation (eV per CH <sub>4</sub> ) |         |
|-------------------------------------------|--------------------------------------------------|---------|----------------------------------------------------|---------|
|                                           | 100 GPa                                          | 300 GPa | 100 GPa                                            | 300 GPa |
| H <sub>2</sub>                            | 0.014                                            | 0.04    | –                                                  | –       |
| CH <sub>4</sub>                           | –                                                | –       | 0.70                                               | 1.70    |
| CH <sub>4</sub> -H <sub>2</sub> fcc       | 0.30                                             | 0.90    | 5.50                                               | 11.50   |
| CH <sub>4</sub> -H <sub>2</sub> by USPEX  | 0.10                                             | 0.27    | 0.75                                               | 2.00    |
| CH <sub>4</sub> -2H <sub>2</sub> by USPEX | 0.04                                             | 0.14    | 0.45                                               | 1.60    |
| CH <sub>4</sub> -3H <sub>2</sub> by USPEX | 0.027                                            | 0.13    | 1.10                                               | 1.80    |
| CH <sub>4</sub> -4H <sub>2</sub> by USPEX | 0.012                                            | 0.09    | 0.60                                               | 2.10    |

Though these structures are begun with fcc type, they will not adopt “fcc” type at high pressure any more. Here, only the case of “fcc” CH<sub>4</sub> is shown in **Figure S16**. The simulated XRD of a perfect fcc CH<sub>4</sub> structure is quite different to the one of the optimized “fcc” CH<sub>4</sub> structure at 300 GPa. This also happens on other fcc type CH<sub>x</sub> structures. It might show the properties of rational solid.

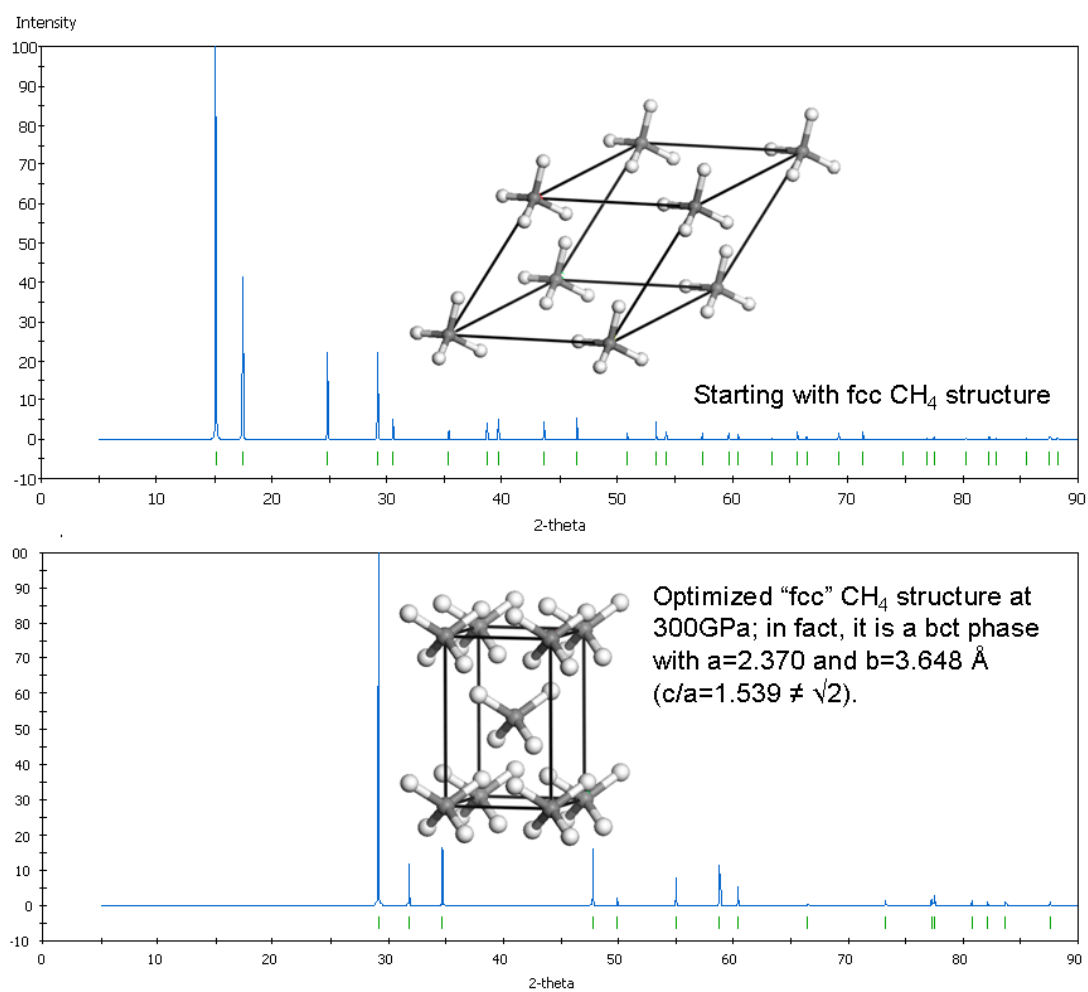

**Figure S16.** Simulated XRD pattern of a perfect fcc CH<sub>4</sub> structure and optimized “fcc” CH<sub>4</sub> structure at 300 GPa. The Synchrotron with a wave length by 1.000 Å is used.

In **Figure S17**, the blue line ( $\text{CH}_4\text{-H}_2$  “wurtzite”) has a big jump, indicating that there might be a phase transition. For the complicated system, it is difficult to check the phase change via bond distance or space group. However, checking XRD pattern is an easy way to see what happened. **Figure S17** shows the difference of XRD between the two  $\text{CH}_4\text{-H}_2$  wurtzite structures at 300 GPa and 350 GPa, respectively; it indicates the possible phase transition.

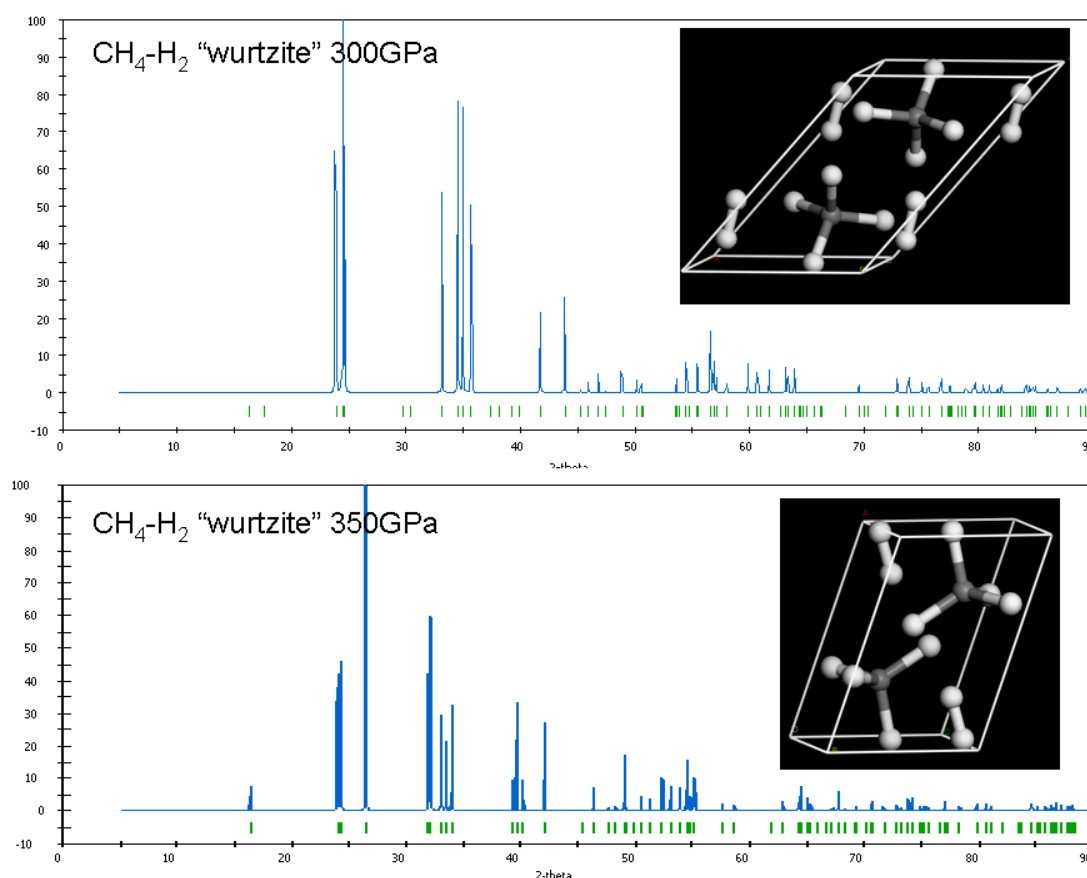

**Figure S17.** Simulated XRD pattern of  $\text{CH}_4\text{-H}_2$  wurtzite structure at 300 GPa and 350 GPa. Here, the radiation source is from Synchrotron with a wave length by 1.000 Å.

It is interesting to know or check whether USPEX is good at searching the most stable  $\text{CH}_x$  structures. Here, I just take the  $\text{CH}_4\text{-H}_2$  wurtzite structure as an example. **Figure S18** shows the simulated XRD of three structures- the starting  $\text{CH}_4\text{-H}_2$  wurtzite structure, the optimized  $\text{CH}_4\text{-H}_2$  “wurtzite” at 5 GPa and  $\text{CH}_4\text{-H}_2$  by USPEX at 5 GPa. Compared the XRD patterns of the starting  $\text{CH}_4\text{-H}_2$  wurtzite structure and the optimized “wurtzite” at 5 GPa, it is hard to say that the  $\text{CH}_4\text{-H}_2$  wurtzite structures can be survived at high pressure, as mentioned before. However, the relative positions of carbon atoms in both optimized “wurtzite” structure at 5 GPa and the one by USPEX at 5 GPa are located at the “hcp”.



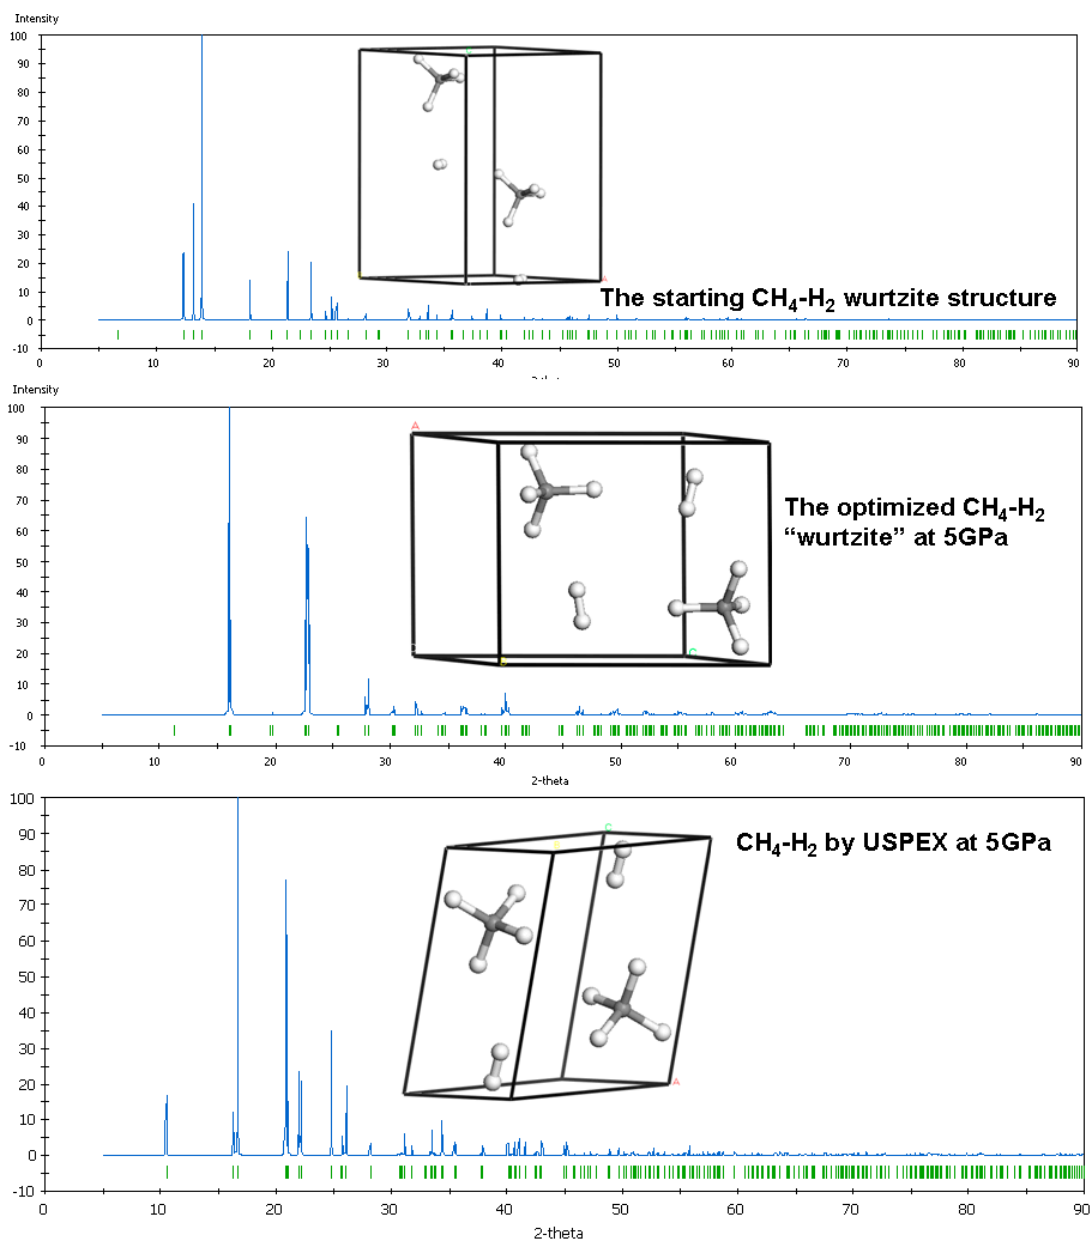

**Figure S18.** Simulated XRD pattern of  $\text{CH}_4\text{-H}_2$  "wurtizte" structure (the starting structure and optimized at 5 GPa) and  $\text{CH}_4\text{-H}_2$  by USPEX at 5 GPa.

The energy will make sense to check the different. **Table S8** listed the relative enthalpy of three different  $\text{CH}_4\text{-H}_2$  structures at 5 GPa. The "fcc" type  $\text{CH}_4\text{-H}_2$  is not

competitive among three structures. Well, the energy of another two structures is quite close (if we do not believe the difference by 0.02 eV). How well is the USPEX?

**Table S8.** Computed the relative enthalpy of three CH<sub>4</sub>-H<sub>2</sub> structures at 5 GPa.

|                                                             | H-H <sub>diamond</sub> +H <sub>2</sub> (eV per C atom) |
|-------------------------------------------------------------|--------------------------------------------------------|
| CH <sub>4</sub> -H <sub>2</sub> "fcc" type at 5 GPa         | -1.29                                                  |
| CH <sub>4</sub> -H <sub>2</sub> "wurtzite" type at 5<br>GPa | -1.34                                                  |
| CH <sub>4</sub> -H <sub>2</sub> by USPEX at 5 GPa           | -1.36                                                  |
